# Supplementary material for: Carbon Dioxide Capture Enhanced by Pre‐Adsorption of Water and Methanol in UiO‐66
Source: PubMed Central journal article supplement — Chemistry. 2021 Sep 20;27(59):14653–9. doi: 10.1002/chem.202102181 (PMC8596581; doi:10.1002/chem.202102181), 2021-09-20
Supplement: CHEM-27-14653-s001.pdf [file CHEM-27-14653-s001.pdf]

# Chemistry–A European Journal

Supporting Information

## **Carbon Dioxide Capture Enhanced by Pre-Adsorption of Water and Methanol in UiO-66**

Gabriela Jajko, Paweł Kozyra,\* Juan José Gutiérrez-Sevillano,\* Wacław Makowski, and  
Sofia Calero\*

## Models of the molecules:

### a) Carbon dioxide

| Nonbonded interactions |                    |               |         |
|------------------------|--------------------|---------------|---------|
| (pseudo)atom           | $\epsilon/k_B$ [K] | $\sigma$ [Å]  | q [e]   |
| C                      | 29.933             | 2.745         | 0.6512  |
| O                      | 85.671             | 3.017         | -0.3256 |
| Bond lengths           |                    |               |         |
| $r_{O=C}$ [Å]          |                    | $r_{C=O}$ [Å] |         |
| 1.15                   |                    | 1.15          |         |
| Bond Angles            |                    |               |         |
| $\alpha_{O=C=O}$ [deg] |                    |               |         |
| 180                    |                    |               |         |

### b) Nitrogen

| Nonbonded interactions |                    |               |          |
|------------------------|--------------------|---------------|----------|
| (pseudo)atom           | $\epsilon/k_B$ [K] | $\sigma$ [Å]  | q [e]    |
| N                      | 38.298             | 3.306         | -0.40484 |
| M                      | -                  | -             | 0.8096   |
| Bond lengths           |                    |               |          |
| $r_{N=N}$ [Å]          |                    | $r_{N-M}$ [Å] |          |
| 1.1                    |                    | 0.55          |          |
| Bond Angles            |                    |               |          |
| $\alpha_{N-M-N}$ [deg] |                    |               |          |
| 180                    |                    |               |          |

### c) Methanol

| Nonbonded interactions    |                    |                        |       |
|---------------------------|--------------------|------------------------|-------|
| (pseudo)atom              | $\epsilon/k_B$ [K] | $\sigma$ [Å]           | q [e] |
| CH <sub>3</sub>           | 98                 | 3.75                   | 0.265 |
| O                         | 93                 | 3.02                   | -0.7  |
| H                         | 0                  | 0                      | 0.435 |
| Bond lengths              |                    |                        |       |
| $r_{CH_3-OH}$ [Å]         |                    | $r_{O-H}$ [Å]          |       |
| 1.43                      |                    | 0.945                  |       |
| Bond Angles               |                    |                        |       |
| $\alpha_{CH_3-O-H}$ [deg] |                    | $k_\alpha/k_B$ [K/rad] |       |
| 108.5                     |                    | 55400                  |       |

d) Water

| Nonbonded interactions |                    |                        |        |
|------------------------|--------------------|------------------------|--------|
| (pseudo)atom           | $\epsilon/k_B$ [K] | $\sigma$ [Å]           | q [e]  |
| O                      | 81.899             | 3.16                   | 0      |
| M                      | -                  | -                      | -1.048 |
| H                      | -                  | -                      | 0.524  |
| Bond lengths           |                    |                        |        |
| $r_{O-M}$ [Å]          |                    | $r_{O-H}$ [Å]          |        |
| 0.125                  |                    | 0.957                  |        |
| Bond Angles            |                    |                        |        |
| $\alpha_{H-O-H}$ [deg] |                    | $\alpha_{H-O-M}$ [deg] |        |
| 104.52                 |                    | 52.26                  |        |

Results:

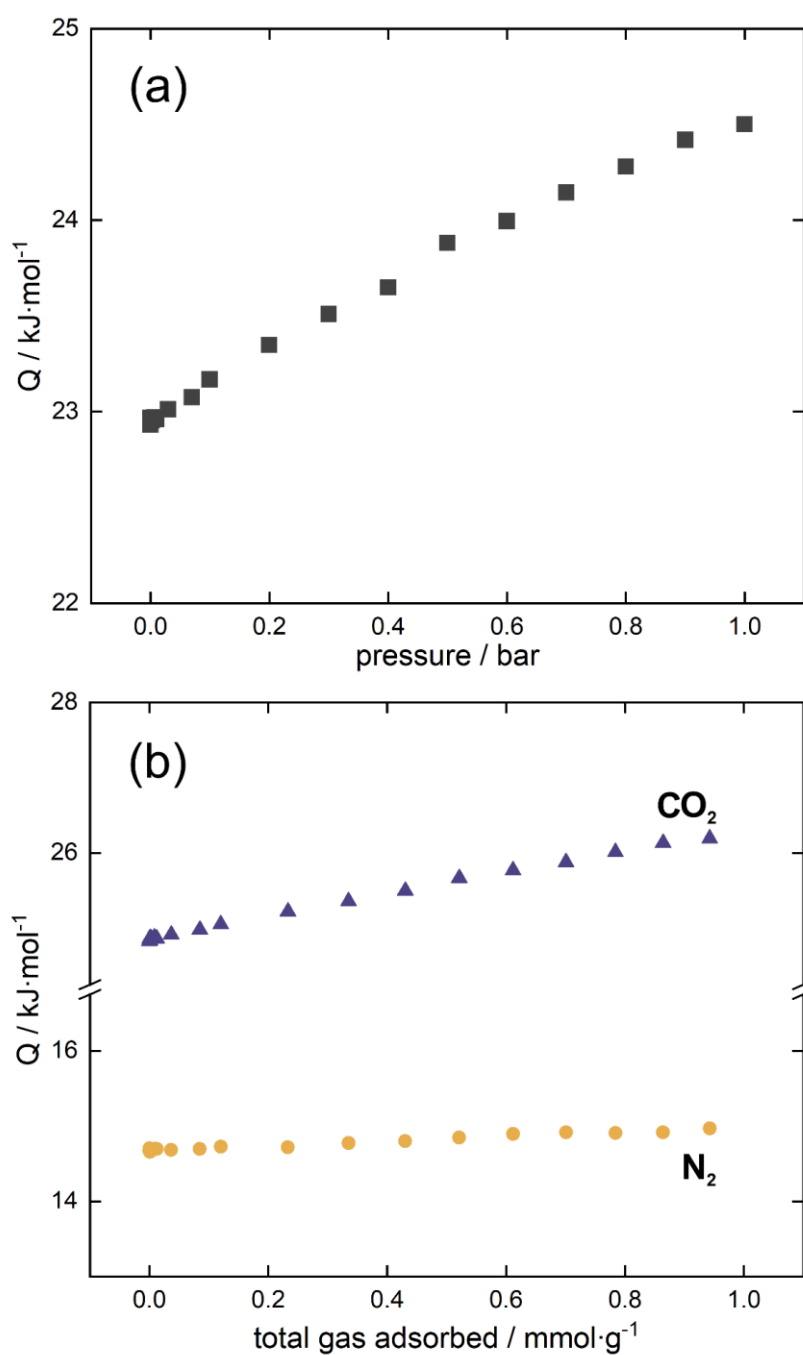

Figure S1. Heat of adsorption of the mixture of  $\text{CO}_2$  and  $\text{N}_2$  (a) and individual components (b) in UiO-66.

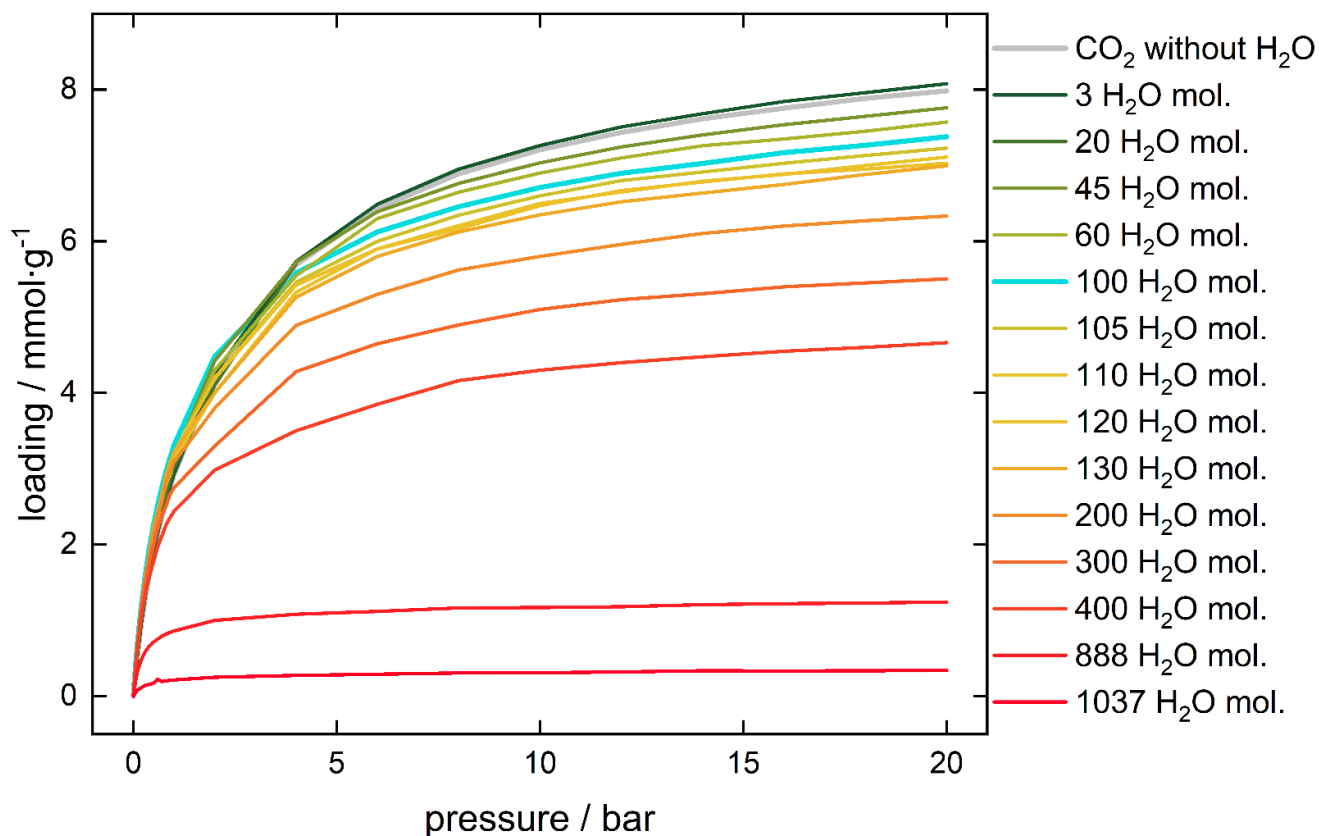

Figure S2. Adsorption isotherms of carbon dioxide with different content of water in pores of UiO-66 from 0 to 20 bar. Grey line stand for CO<sub>2</sub> adsorption, cyan line stand for an isotherm with pre-adsorbed 100 molecules of water per unit cell.

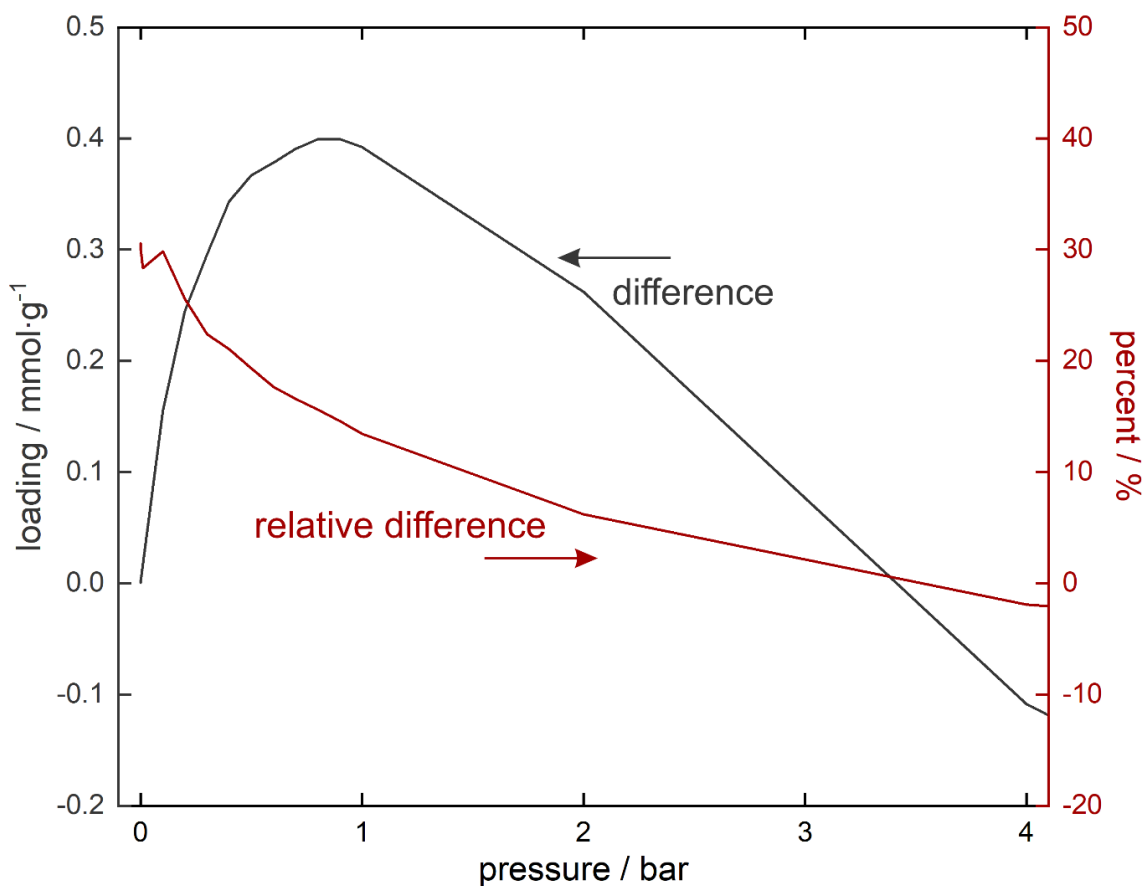

Figure S3. Difference (grey) and relative difference (red) between carbon dioxide adsorption and carbon dioxide with pre-adsorbed 1.8 mmol·g<sup>-1</sup> of water.

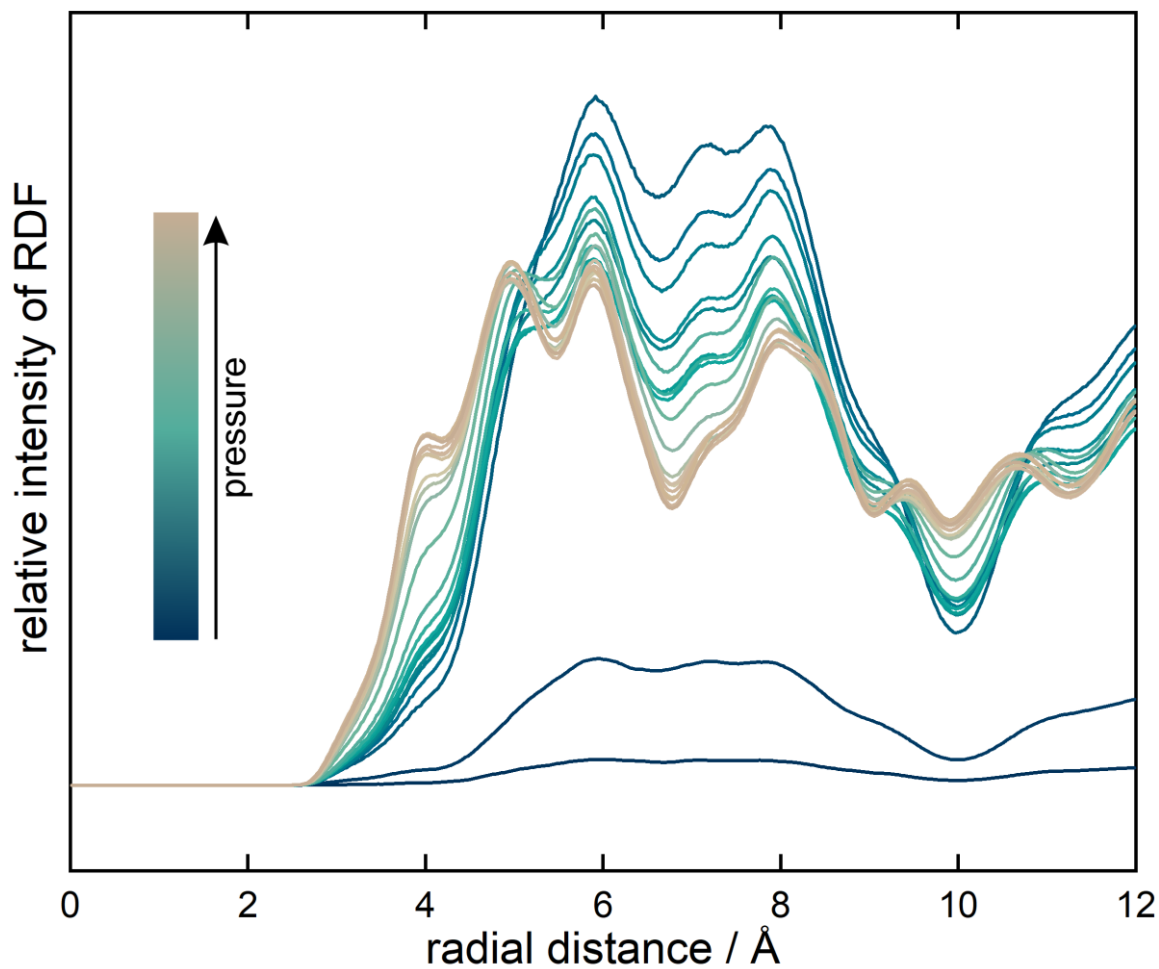

Figure S4. Radial distribution functions between the oxygen atom from water and the carbon atom from carbon dioxide in rising pressure from 0 to 20 bar.

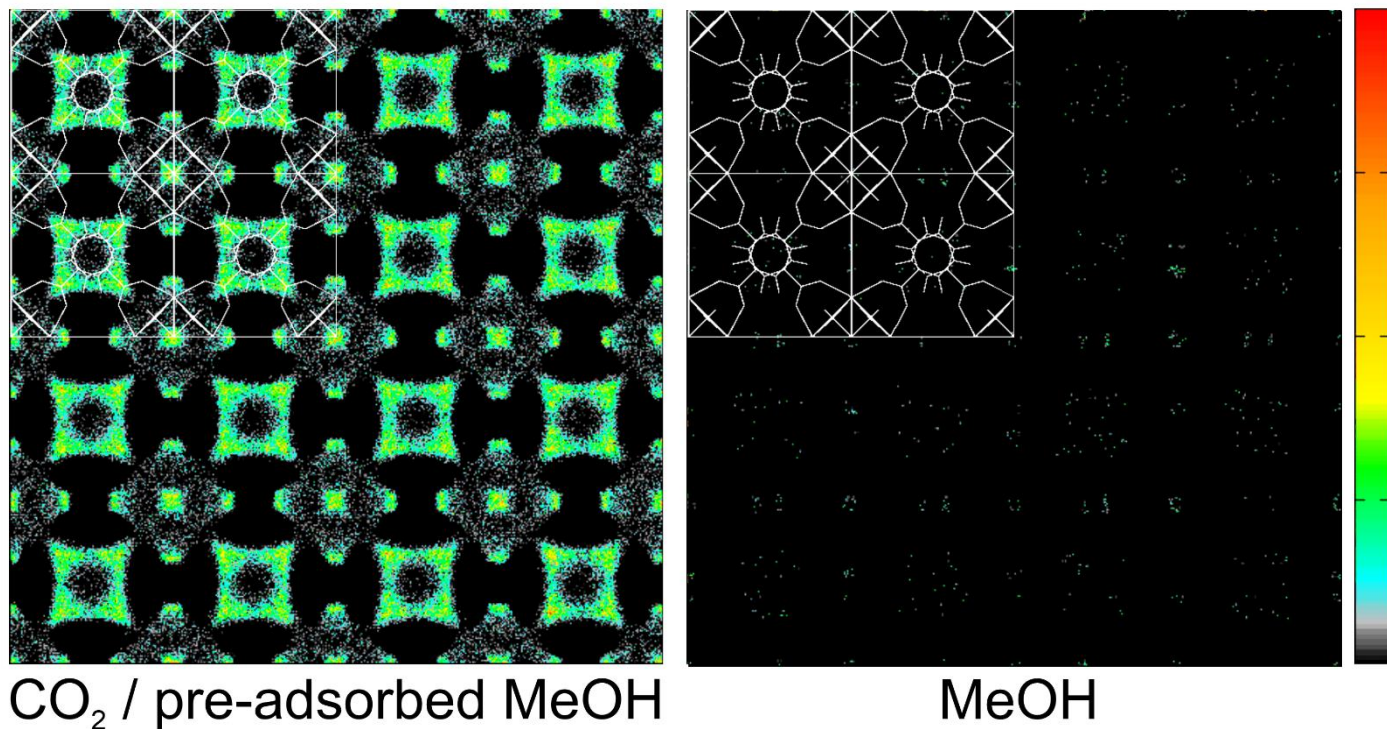

Figure S5. Average occupational density profiles of: 0.1 mmol·g<sup>-1</sup> of methanol (right) and carbon dioxide with pre-adsorbed 0.1 mmol·g<sup>-1</sup> of methanol (left) at 20 bar. For better observation of the effect, methanol molecules were not included in the left figure. The schemes of the structure and color scale are also included.
